# Supplementary material for: Androgen receptor signaling promotes Treg suppressive function during allergic airway inflammation
Source: JCI journal article supplement (doi:10.1172/jci153397), 2022-01-13
Supplement: sd1 [file 1]

## **Androgen receptor signaling promotes Treg suppressive function during allergic airway inflammation**

Vivek D. Gandhi<sup>1\*</sup>, Jacqueline-Yvonne Cephus<sup>1\*</sup>, Allison E. Norlander<sup>1</sup>, Nowrin U. Chowdhury<sup>2</sup>, Jian Zhang<sup>1</sup>, Zachary Ceneviva<sup>1</sup>, Elie Tannous<sup>1</sup>, Vasiliy V Polosukhin<sup>1</sup>, Nathan D. Putz<sup>1</sup>, Nancy Wickersham<sup>1</sup>, Amrit Singh<sup>3</sup>, Lorraine B. Ware<sup>1</sup>, Julie A. Bastarache<sup>1</sup>, Ciara M. Shaver<sup>1</sup>, Hong Wei Chu<sup>4</sup>, R. Stokes Peebles, Jr.<sup>1,2</sup>, Dawn C. Newcomb<sup>1,2</sup>

<sup>1</sup> Department of Medicine, Vanderbilt University Medical Center, Nashville, TN, USA

<sup>2</sup> Department of Pathology, Microbiology, and Immunology, Vanderbilt University Medical Center, Nashville, TN, USA

<sup>3</sup> Prevention of Organ Failure (PROOF) Centre of Excellence, University of British Columbia, Vancouver, BC, Canada

<sup>4</sup>National Jewish Medical Center, Denver, CO, USA

\* contributed equally to this work.

Corresponding author:

Dawn C. Newcomb, PhD

T-1218 Medical Center North

1161 21<sup>st</sup> Avenue South

Nashville, TN 37232

(615) 875-7782

dawn.newcomb@vumc.org

Conflicts of interest: The authors have declared that no conflict of interest exists.

**Supplement Table – Antibodies, viability dyes, and isolation kits used in this project**

| Reagent                                | Antibody target    | Clone        | Fluorophore                            | Manufacturer      | Catalog Number |
|----------------------------------------|--------------------|--------------|----------------------------------------|-------------------|----------------|
| anti-mouse antibody                    | Bcl6               | K112-91      | Alexa Fluor 647                        | BD Biosciences    | 561525         |
| anti-mouse antibody                    | CD16/CD32          | 2.4G2        | Purified                               | BD Biosciences    | 553142         |
| anti-mouse antibody                    | CD25               | PC61         | APC-Cy7                                | BD Biosciences    | 557658         |
| anti-mouse antibody                    | CD28               | 37.51        | Ultra-LEAF purified                    | BioLegend         | 102116         |
| anti-mouse antibody                    | CD3                | 17A2         | Alexa Fluor 700                        | BioLegend         | 100216         |
| anti-mouse antibody                    | CD3                | 145-2C11     | APC-Cy7                                | BD Biosciences    | 557596         |
| anti-mouse antibody                    | CD3e               | 145-2C11     | Ultra-LEAF purified                    | BioLegend         | 100340         |
| anti-mouse antibody                    | CD4                | GK1.5        | Alexa Fluor 700                        | BioLegend         | 100429         |
| anti-mouse antibody                    | CD4                | GK1.5        | FITC                                   | eBioscience       | 11-0041-82     |
| anti-mouse antibody                    | CD4                | H129.19      | PE-Cy5                                 | BD Biosciences    | 553654         |
| anti-mouse antibody                    | CD4                | RM4-5        | PE-Cy7                                 | BioLegend         | 100527         |
| anti-mouse antibody                    | CD4                | RM4-5        | PerCP-Cy5.5                            | BD Biosciences    | 550954         |
| anti-mouse antibody                    | CD90               | 53-2.1       | Brilliant Violet 786                   | BD Biosciences    | 564365         |
| anti-mouse antibody                    | CTLA4              | UC10-4F10-11 | APC                                    | BD Biosciences    | 564331         |
| anti-mouse antibody                    | DO11.10 TCR        | KJ126        | Biotin                                 | eBioscience       | 13-5808-82     |
| anti-mouse antibody                    | ICOS               | C398.4A      | PE-Cy7                                 | eBioscience       | 25-9949-82     |
| anti-mouse antibody                    | IL-13              | eBio13A      | PerCP-Cy5.5                            | eBioscience       | 46-7133-80     |
| anti-mouse antibody                    | LAG-3              | C9B7W        | Brilliant Violet 786                   | BD Biosciences    | 740959         |
| anti-mouse antibody                    | ST2                | U29-93       | Brilliant Violet 421                   | BD Biosciences    | 566309         |
| anti-mouse antibody                    | ST2                | U29-93       | PE                                     | BD Biosciences    | 566311         |
| anti-mouse antibody                    | Streptavidin       |              | PECF594                                | BD Biosciences    | 562284         |
| anti-human antibody                    | CD2, CD3, and CD28 |              | T Cell Activation/Expansion Kit, human | Miltenyi Biotec   | 130-091-441    |
| anti-human antibody                    | CD25               | BC96         | APC-Cy7                                | BioLegend         | 302614         |
| anti-human antibody                    | CD3                | UCHT1        | PacBlue                                | BD Biosciences    | 558117         |
| anti-human antibody                    | CD4                | SK3          | FITC                                   | BD Biosciences    | 562970         |
| anti-human antibody                    | CD45               | HI30         | redFluor 710 (AF700)                   | Tonbo Biosciences | 80-0459        |
| anti-human antibody                    | ST2                |              | APC                                    | R&D Systems       | FAB5231A       |
| anti-mouse/human antibody              | Foxp3              | FJK-16S      | PE-Cy7                                 | eBioscience       | 25-5773-82     |
| anti-mouse/human antibody              | GATA3              | L50-823      | PECF594 (TxREd)                        | BD Biosciences    | 563510         |
| Cell viability dye                     |                    |              | Live/Dead Aqua                         | ThermoFisher      | L34957         |
| Cell viability dye                     |                    |              | Ghost Dye UV 450                       | Tonbo Biosciences | 13-0868        |
| Cell viability dye                     |                    |              | Ghost Dye Violet 510                   | Tonbo Biosciences | 13-0870        |
| Cell proliferation dye                 |                    |              | Cell Trace Violet                      | ThermoFisher      | C34571         |
| CD4+ CD62L+ naïve T cell isolation kit |                    |              |                                        | Miltenyi Biotec   | 130-106-643    |
| CD4+ T cell isolation kit              |                    |              |                                        | Miltenyi Biotec   | 130-104-454    |

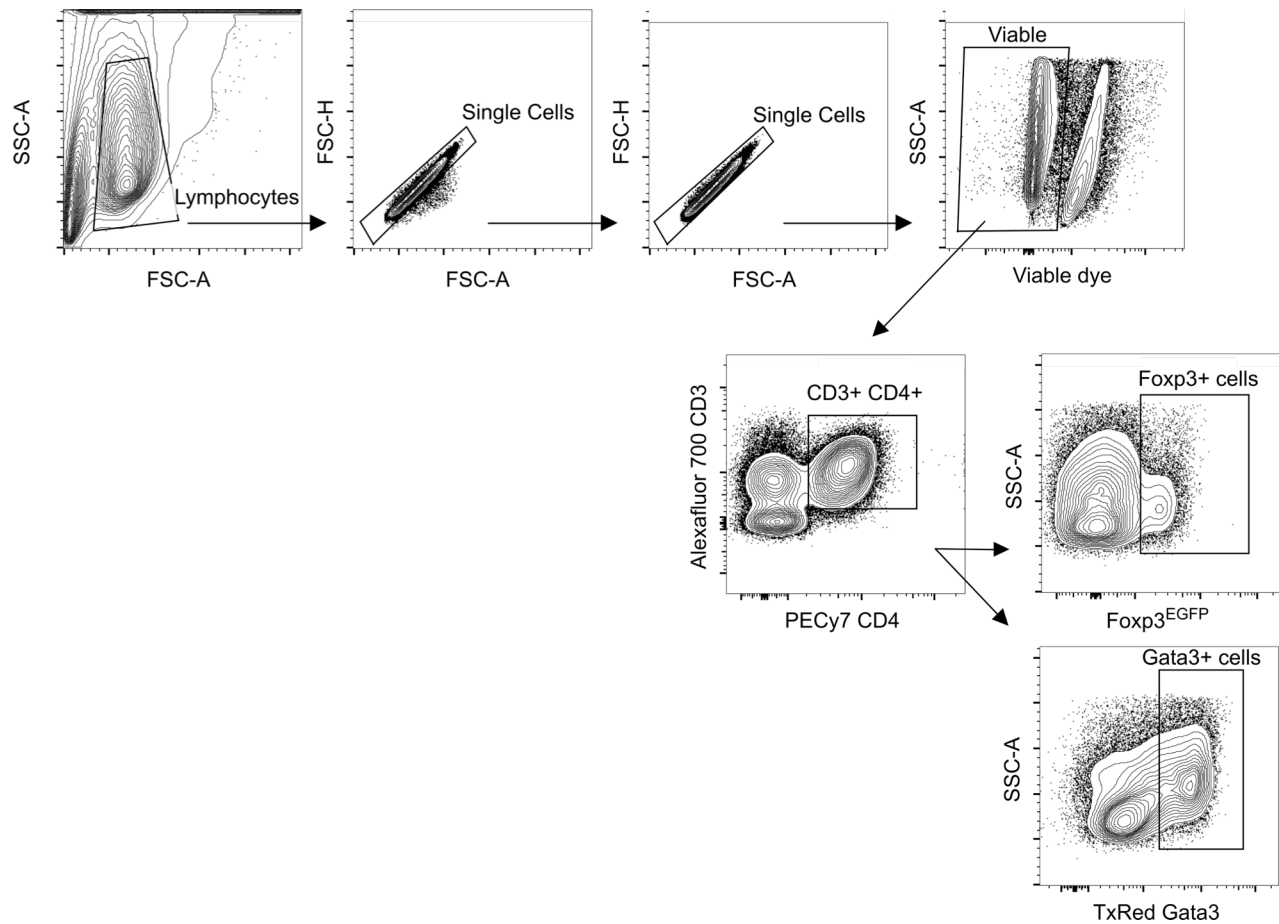

**Supplemental Figure 1. Gating strategy for identification of Tregs (CD3+ CD4+ Fop3+) and Th2 cells (CD3+ CD4+ GATA3+).** Representative sample showing gating strategy.

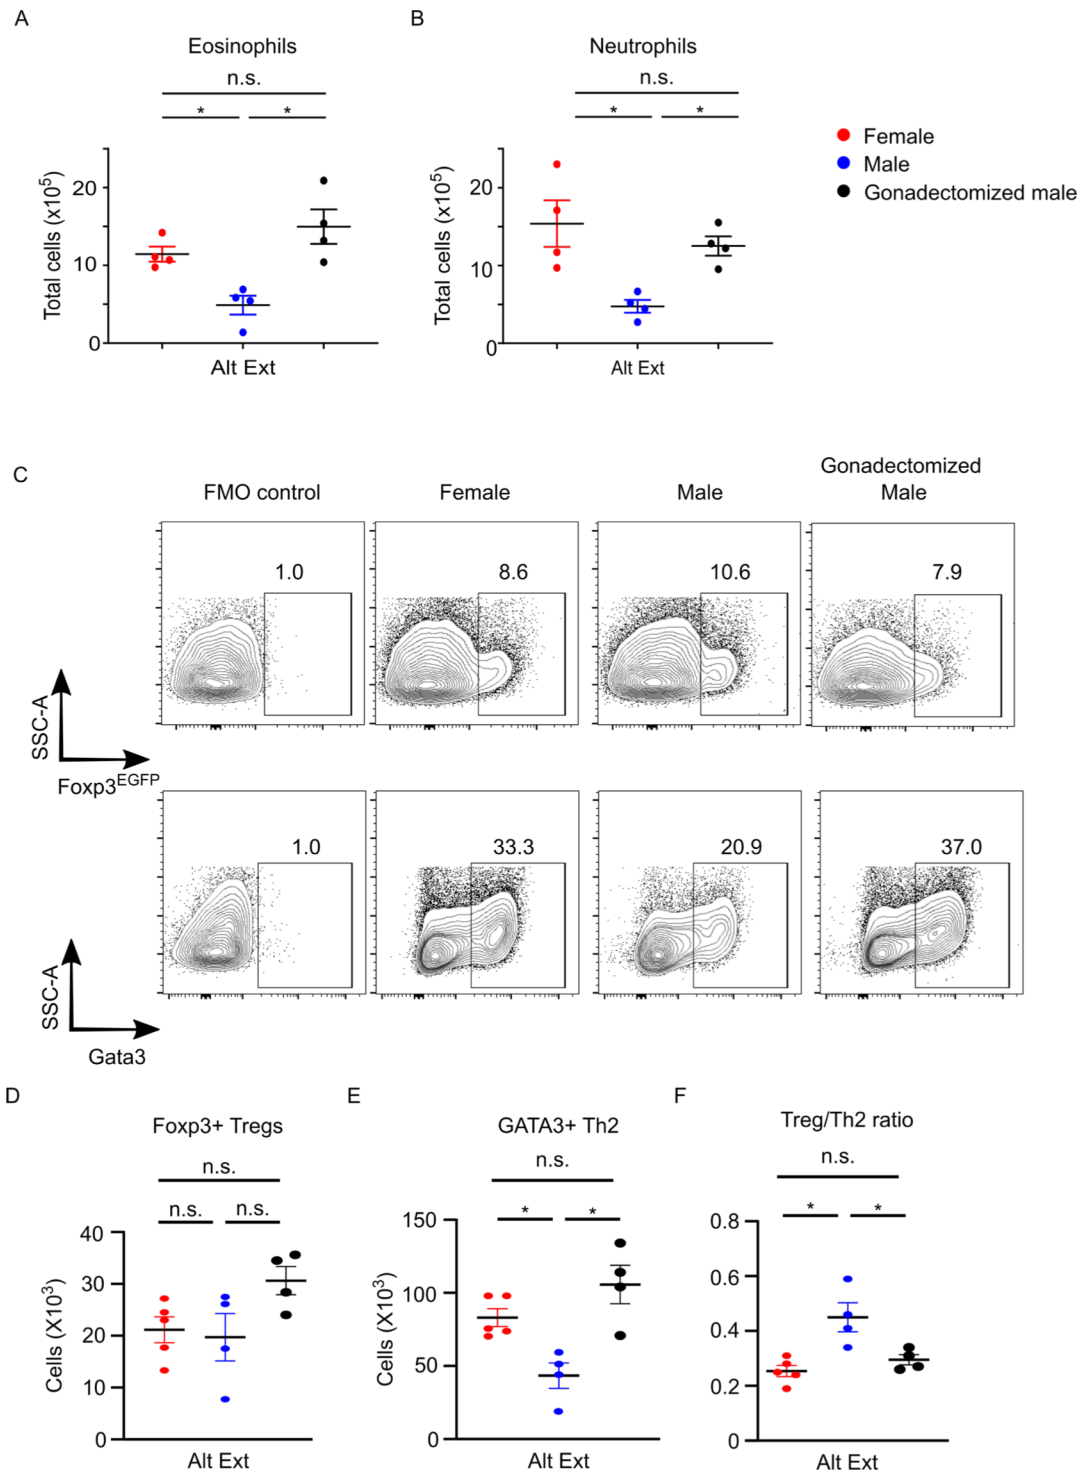

**Supplemental Figure 2. Testosterone decreases Alt Ext induced allergic inflammation and increases Treg to Th2 cell ratio.** Sham-operated C57BL/6J male and female mice and gonadectomized male mice underwent the Alt Ext protocol. BAL fluid and lungs were harvested 1 day following the last challenge. **(A-B)**. Eosinophils and neutrophils in BAL fluid. **(C)** Representative dot plots showing gating for Tregs and Th2 cells in lung (cells were pre-gated on viable, CD3<sup>+</sup> CD4<sup>+</sup> cells). **(D-F)**. Quantification of Tregs, Th2, and the Treg to Th2 ratio. Data are mean  $\pm$  SEM;  $n = 4-5$ , \*  $p < 0.05$ , ANOVA with Tukey post-hoc.

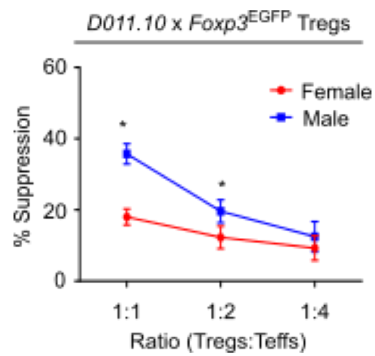

**Supplemental Figure 3. Male Tregs are more suppressive than female Tregs in *D011.10 x Foxp3<sup>EGFP</sup>* mice.** Treg suppression assay using Tregs from *D011.10 x Foxp3<sup>EGFP</sup>* female or male mice and T effector cells (Teffs) from *D011.10* female mice. Percent suppression of Tregs at various ratios of Tregs to Teffs. Data are mean  $\pm$  SEM; n = 3, representative data from 2 experiments \* p<0.05, ANOVA with Tukey post-hoc.

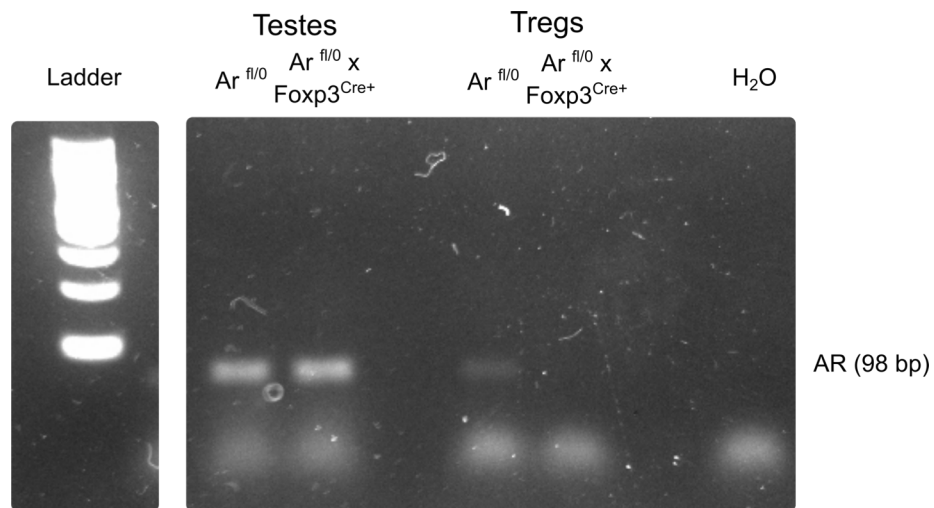

**Supplemental figure 4. PCR verification of AR deficiency in Tregs.** PCR was conducted on testes and splenic Tregs from  $Ar^{fl/0}$  and  $Ar^{fl/0} \times Foxp3^{Cre+}$  male mice. Water was used as a negative control.

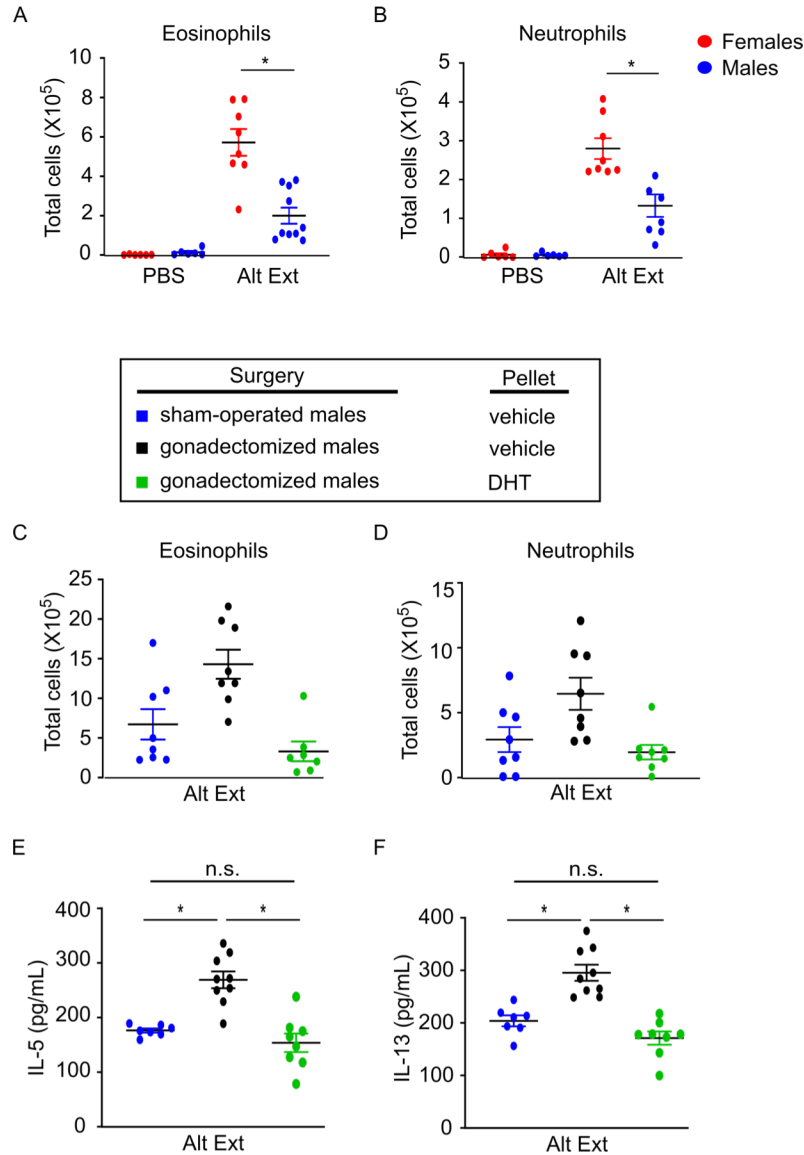

**Supplemental figure 5. AR signaling decreases Alt Ext-induced airway inflammation in *Foxp3*<sup>GFP/YFP</sup>  $\times$  *Il13*<sup>Tdtomato</sup> mice. (A-B)** BAL eosinophils and neutrophils in female and male *Foxp3*<sup>GFP/YFP</sup>  $\times$  *Il13*<sup>Tdtomato</sup> mice. **(C-F)** *Foxp3*<sup>GFP/YFP</sup>  $\times$  *Il13*<sup>Tdtomato</sup> male mice underwent gonadectomy or sham operation at 3-4 weeks of age. At 8 weeks old, 5 $\alpha$ -DHT (DHT) or vehicle slow-release pellets were subcutaneously placed into mice. After 3 weeks, mice underwent Alt Ext protocol. **(C-D)** BAL eosinophils and neutrophils. **(E-F)** IL-5 and IL-13 levels in whole lung homogenates. Data are mean  $\pm$  SEM; n = 6-10 from 2 separate experiments, \* p<0.05, ANOVA with Tukey post-hoc.

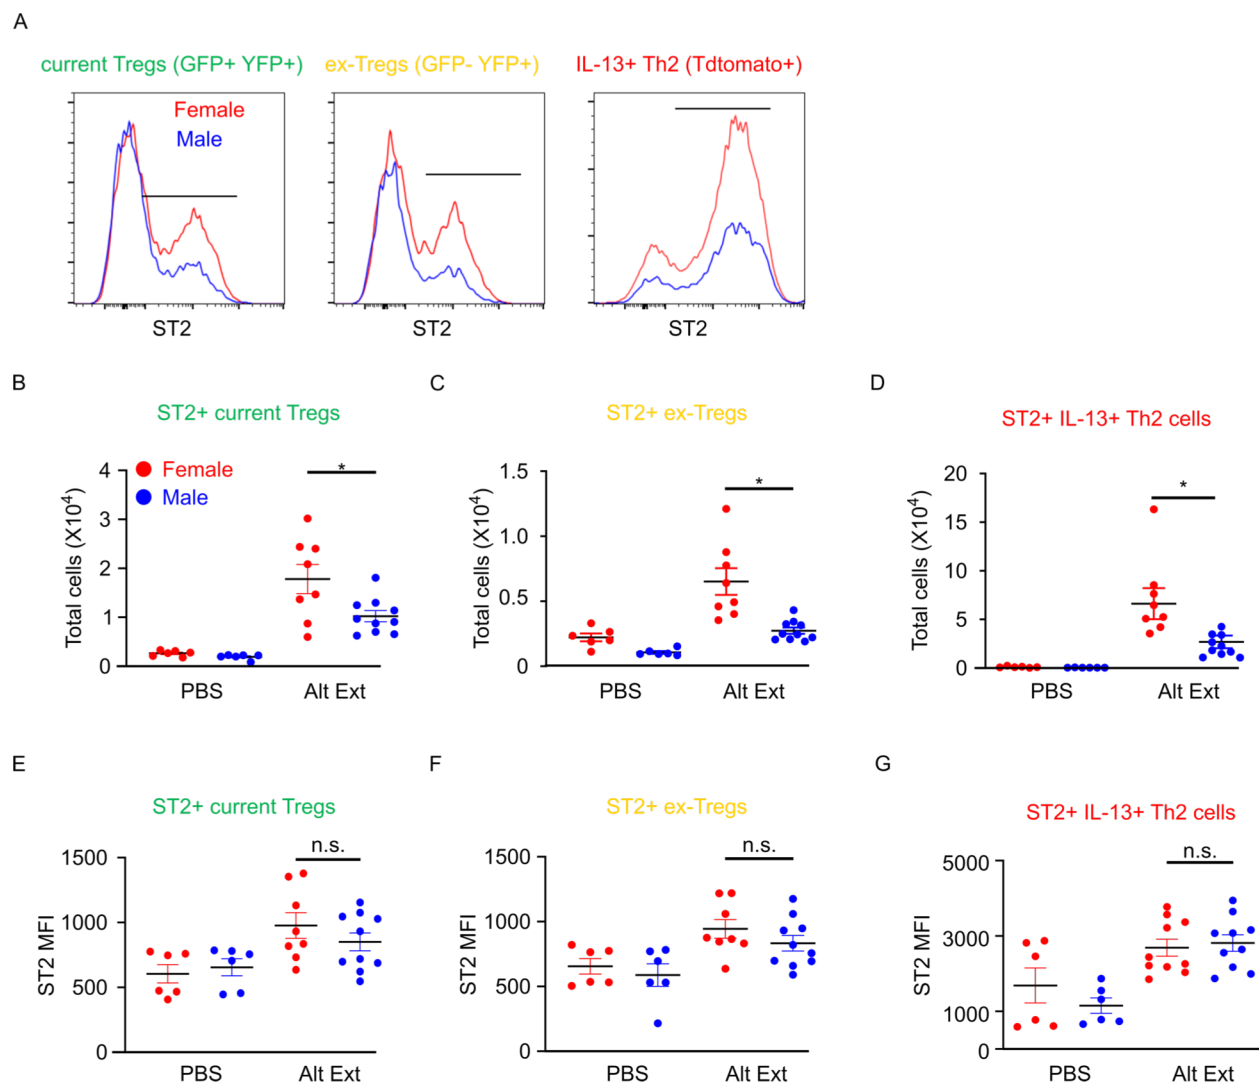

**Supplemental figure 6. Males have decreased numbers of ST2+ Tregs after Alt Ext challenge.** (A) Representative histograms of ST2+ current Tregs, ex-Tregs, or Th2 cells from *Foxp3*<sup>GFP/YFP</sup> x *Il13*<sup>Tdtomato</sup> female and male mice. (B-D) Numbers of ST2+ current Tregs, ex-Tregs, and IL-13+ Th2 cells in lungs of mice. (E-G) ST2 MFI. Data are mean  $\pm$  SEM; n = 6-10 from 2 separate experiments, \* p<0.05, ANOVA with Tukey post-hoc.



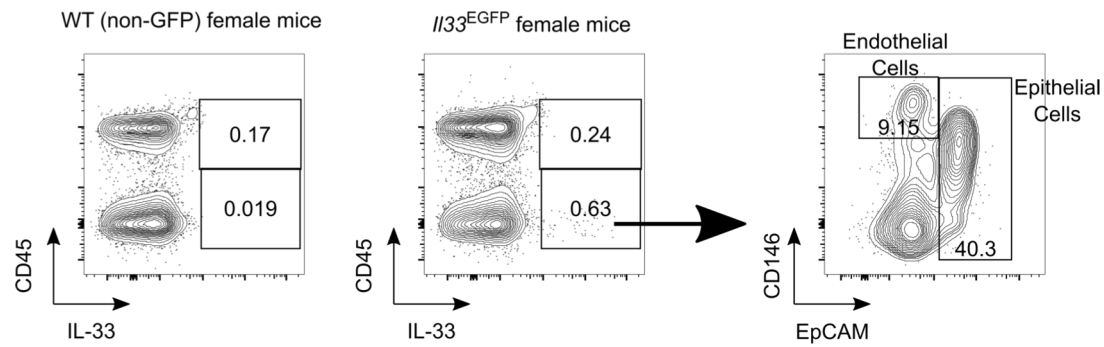

**Supplemental Figure 7. Gating strategy for identification *IL-33<sup>EGFP</sup>* cells.**

Representative dot plots showing that epithelial cells were identified as CD45- EpCAM+, endothelial cells were identified as CD45- EpCAM- CD146+, and immune cells were identified as CD45+ cells.

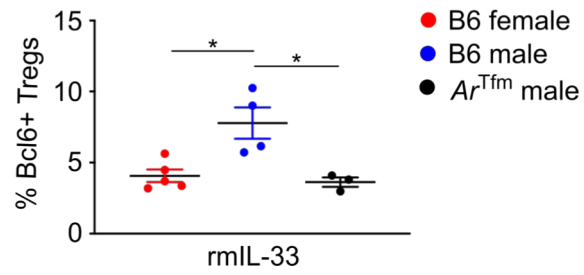

**Supplemental Figure 8. AR signaling increases Bcl6+ Tregs.** Bcl6+ Tregs were determined from rmlL-33 challenged female, male, and  $Ar^{Tfm}$  male mice. Data are mean  $\pm$  SEM; n = 3-5, \* p<0.05, ANOVA with Tukey post-hoc.
